# Supplementary material
Source: MDPI journal article supplement (https://www.mdpi.com/2077-1312/12/1/61)
Supplement: s1 [file s1]

**Table S1. Basic information of samples.**

| Sample ID | Deployment | Sampling date | Depth (m) | Longitude    | Latitude    |
|-----------|------------|---------------|-----------|--------------|-------------|
| NISKIN    | FH14-1     | 2018/7/14     | 1152      | 110°10.39'E  | 17°11.43'N  |
| ISMIFF-1  | FH12-1     | 2018/7/12     | 1150      | 110°10.44'E  | 17°11.53'N  |
| ISMIFF-2  | FH14-2     | 2018/7/14     | 1152      | 110°10.39'E  | 17°11.43'N  |
| ISMIFF-N  | FH13-1     | 2018/7/14     | 1150      | 110°10.39'E  | 17°11.42'N  |
| M-IN-M1   | FH12-1     | 2018/7/12     | 1150      | 110°10.44'E  | 17°11.53'N  |
| M-IN-M2   | FH14-1     | 2018/7/14     | 1152      | 110°10.39'E  | 17°11.43'N  |
| M-IN-M3   | FH14-2     | 2018/7/14     | 1152      | 110°10.39'E  | 17°11.43'N  |
| M-IN-M4   | FH60-3     | 2022/3/21     | 591       | 110°39.987'E | 17°53.374'N |
| M-IN-M5   | FH60-4     | 2022/3/21     | 591       | 110°39.987'E | 17°53.374'N |
| M-IN-M6   | FH60-5     | 2022/3/21     | 591       | 110°39.987'E | 17°53.374'N |
| M-IN-M7   | FH60-6     | 2022/3/21     | 591       | 110°39.987'E | 17°53.374'N |
| M-IN-M8   | FH60-7     | 2022/3/21     | 591       | 110°39.987'E | 17°53.374'N |
| M-IN-M9   | FH60-8     | 2022/3/21     | 591       | 110°39.987'E | 17°53.374'N |
| M-IN-M10  | FH61-3     | 2022/3/22     | 598       | 110°39.888'E | 17°53.216'N |
| M-IN-M11  | FH61-4     | 2022/3/22     | 598       | 110°39.888'E | 17°53.216'N |
| M-IN-M12  | FH61-5     | 2022/3/22     | 598       | 110°39.888'E | 17°53.216'N |
| M-IN-M13  | FH61-6     | 2022/3/22     | 598       | 110°39.888'E | 17°53.216'N |
| M-IN-M14  | FH61-7     | 2022/3/22     | 598       | 110°39.888'E | 17°53.216'N |
| M-IN-M15  | FH62-1     | 2022/3/23     | 1130      | 110°48.345'E | 17°50.580'N |
| M-IN-M16  | FH62-2     | 2022/3/23     | 1130      | 110°48.345'E | 17°50.580'N |
| M-IN-M17  | FH62-3     | 2022/3/23     | 1130      | 110°48.345'E | 17°50.580'N |
| M-IN-M18  | FH62-4     | 2022/3/23     | 1130      | 110°48.345'E | 17°50.580'N |
| M-IN-M19  | FH62-5     | 2022/3/23     | 1130      | 110°48.345'E | 17°50.580'N |
| M-IN-M20  | FH63-3     | 2022/3/26     | 3102      | 112°59.442'E | 15°20.224'N |
| M-IN-M21  | FH63-4     | 2022/3/26     | 3102      | 112°59.442'E | 15°20.224'N |

|          |        |           |      |              |             |
|----------|--------|-----------|------|--------------|-------------|
| M-IN-M22 | FH63-5 | 2022/3/26 | 3102 | 112°59.442'E | 15°20.224'N |
| M-IN-M23 | FH63-6 | 2022/3/26 | 3102 | 112°59.442'E | 15°20.224'N |
| M-IN-M24 | FH63-7 | 2022/3/26 | 3102 | 112°59.442'E | 15°20.224'N |
| M-IN-M25 | FH63-8 | 2022/3/26 | 3102 | 112°59.442'E | 15°20.224'N |
| M-IN-C1  | FH12-1 | 2018/7/12 | 1150 | 110°10.44'E  | 17°11.53'N  |
| M-IN-C2  | FH14-1 | 2018/7/14 | 1152 | 110°10.39'E  | 17°11.43'N  |
| M-IN-C3  | FH60-3 | 2022/3/21 | 591  | 110°39.987'E | 17°53.374'N |
| M-IN-C4  | FH60-4 | 2022/3/21 | 591  | 110°39.987'E | 17°53.374'N |
| M-IN-C5  | FH60-5 | 2022/3/21 | 591  | 110°39.987'E | 17°53.374'N |
| M-IN-C6  | FH60-6 | 2022/3/21 | 591  | 110°39.987'E | 17°53.374'N |
| M-IN-C7  | FH61-3 | 2022/3/22 | 598  | 110°39.888'E | 17°53.216'N |
| M-IN-C8  | FH61-4 | 2022/3/22 | 598  | 110°39.888'E | 17°53.216'N |
| M-IN-C9  | FH61-5 | 2022/3/22 | 598  | 110°39.888'E | 17°53.216'N |
| M-IN-C10 | FH61-6 | 2022/3/22 | 598  | 110°39.888'E | 17°53.216'N |
| M-IN-C11 | FH63-3 | 2022/3/26 | 3102 | 112°59.442'E | 16°20.224'N |
| M-IN-C12 | FH63-4 | 2022/3/26 | 3102 | 112°59.442'E | 16°20.224'N |
| M-IN-C13 | FH63-5 | 2022/3/26 | 3102 | 112°59.442'E | 16°20.224'N |
| M-IN-C14 | FH63-6 | 2022/3/26 | 3102 | 112°59.442'E | 16°20.224'N |
| M-IN-C15 | FH63-7 | 2022/3/26 | 3102 | 112°59.442'E | 16°20.224'N |
| M-IN-C16 | FH63-8 | 2022/3/26 | 3102 | 112°59.442'E | 16°20.224'N |

The sampling sites are shown in Figure 1. ISMIF-1-2 refer to RNALater preserved samples collected by MISNAC; ISMIF-N refers to an untreated sample collected by MISNAC membrane; M-IN-M1-25 are lysed samples on the MISNAC membranes; M-IN-C1-16 represent in situ collected DNA samples on the absorption column.

**Table S2.** Statistics of metagenomic sequencing data and 18S miTags.

| Sample ID | Total bases (Gbp) |            | No. 18S     | No. 18S   | Shannon | Chao1 |
|-----------|-------------------|------------|-------------|-----------|---------|-------|
|           | Raw data          | Clean data | all regions | V9 region |         |       |
| NISKIN    | 1.02              | 0.88       | 7145        | 785       | 3.59    | 281   |
| ISMIFF-1  | 1.85              | 1.62       | 3752        | 403       | 4.01    | 68    |
| ISMIFF-2  | 2.28              | 2.01       | 4732        | 582       | 3.97    | 60    |
| ISMIFF-N  | 2.87              | 2.45       | 3321        | 802       | 4.54    | 116   |
| M-IN-M1   | 5.14              | 4.97       | 17465       | 2553      | 3.63    | 57    |
| M-IN-M2   | 3.31              | 3.01       | 18142       | 2728      | 4.81    | 154   |
| M-IN-M3   | 2.91              | 2.78       | 10183       | 1874      | 4.79    | 144   |
| M-IN-M4   | 7.15              | 6.55       | 15471       | 3081      | 4.54    | 116   |
| M-IN-M5   | 3.78              | 3.45       | 17895       | 3432      | 3.59    | 62    |
| M-IN-M6   | 2.49              | 2.07       | 39541       | 6701      | 4.95    | 175   |
| M-IN-M7   | 2.18              | 1.97       | 3157        | 320       | 3.54    | 37    |
| M-IN-M8   | 3.97              | 3.54       | 16523       | 2132      | 4.32    | 147   |
| M-IN-M9   | 1.86              | 1.45       | 12549       | 1868      | 4.60    | 153   |
| M-IN-M10  | 5.18              | 4.85       | 84973       | 11270     | 3.96    | 128   |
| M-IN-M11  | 4.87              | 4.54       | 22536       | 3948      | 4.87    | 240   |
| M-IN-M12  | 3.59              | 3.22       | 1187        | 89        | 3.97    | 72    |
| M-IN-M13  | 4.76              | 4.39       | 5897        | 733       | 4.16    | 144   |
| M-IN-M14  | 4.41              | 4.03       | 16572       | 1907      | 3.01    | 23    |
| M-IN-M15  | 2.64              | 2.34       | 25169       | 3096      | 4.05    | 99    |
| M-IN-M16  | 3.78              | 3.48       | 16308       | 2582      | 4.18    | 101   |
| M-IN-M17  | 4.08              | 3.74       | 18452       | 2190      | 4.61    | 128   |
| M-IN-M18  | 6.03              | 5.48       | 5569        | 642       | 4.30    | 157   |
| M-IN-M19  | 3.81              | 3.60       | 6694        | 785       | 4.14    | 86    |
| M-IN-M20  | 5.89              | 5.48       | 1854        | 161       | 4.51    | 135   |
| M-IN-M21  | 8.18              | 7.68       | 4980        | 619       | 4.53    | 126   |
| M-IN-M22  | 7.08              | 6.82       | 2263        | 329       | 3.90    | 68    |
| M-IN-M23  | 4.29              | 3.83       | 7569        | 747       | 4.05    | 99    |
| M-IN-M24  | 5.18              | 4.86       | 2815        | 334       | 3.46    | 133   |
| M-IN-M25  | 6.13              | 5.72       | 2593        | 308       | 4.53    | 122   |
| M-IN-C1   | 8.11              | 7.83       | 1396584     | 143382    | 4.53    | 190   |

|          |      |      |         |        |      |     |
|----------|------|------|---------|--------|------|-----|
| M-IN-C2  | 9.65 | 9.05 | 1224876 | 130751 | 4.61 | 251 |
| M-IN-C3  | 7.45 | 7.02 | 1548632 | 164833 | 5.07 | 330 |
| M-IN-C4  | 6.98 | 6.58 | 187534  | 19405  | 4.04 | 268 |
| M-IN-C5  | 6.25 | 5.91 | 142180  | 13818  | 4.44 | 242 |
| M-IN-C6  | 6.13 | 5.62 | 21286   | 2742   | 4.41 | 298 |
| M-IN-C7  | 3.45 | 3.09 | 37485   | 4000   | 4.45 | 301 |
| M-IN-C8  | 5.16 | 4.76 | 462085  | 44487  | 4.21 | 235 |
| M-IN-C9  | 6.07 | 5.70 | 325448  | 25971  | 4.74 | 299 |
| M-IN-C10 | 5.03 | 4.65 | 41596   | 4089   | 4.12 | 226 |
| M-IN-C11 | 9.80 | 9.15 | 1682047 | 165277 | 4.45 | 292 |
| M-IN-C12 | 9.09 | 8.57 | 1487402 | 143382 | 4.58 | 255 |
| M-IN-C13 | 4.18 | 3.75 | 210547  | 22597  | 4.76 | 183 |
| M-IN-C14 | 7.64 | 7.20 | 485293  | 58407  | 4.05 | 180 |
| M-IN-C15 | 9.18 | 8.71 | 24150   | 2315   | 4.35 | 224 |
| M-IN-C16 | 8.41 | 8.02 | 38596   | 6363   | 4.01 | 172 |

---

The 18S miTags were identified and extracted from the clean reads of the metagenomes.

The sample IDs are referred to Table S1.
